# Supplementary material for: Unravelling the structure sensitivity of CuO/SiO2 catalysts in the NO + CO reaction
Source: Royal Society of Chemistry journal article supplement (doi:10.1039/d0cy00191k), 2020-01-01
Supplement: d0cy00191k1.pdf [file d0cy00191k1.pdf]

Supporting Information

**Unravelling the structure sensitivity of CuO/SiO<sub>2</sub>  
catalysts in NO + CO reaction**

Xiuwen Wang,<sup>a</sup> Jin Wang,<sup>a</sup> Annai Liu,<sup>a</sup> Yaxin Yu,<sup>a</sup> Jiawei Ji,<sup>a</sup> Kai Guo,<sup>a</sup> Haiqin Wan,<sup>bc</sup> Changjin Tang<sup>\*ab</sup> and Lin Dong<sup>abc</sup>

<sup>a</sup> *School of Chemistry and Chemical Engineering, Nanjing University, Nanjing 210023, China.*

<sup>b</sup> *Jiangsu Key Laboratory of Vehicle Emissions Control, Nanjing 210023, China.*

<sup>c</sup> *School of Environment, Nanjing University, Nanjing 210023, China.*

\* Corresponding author:

E-mail address: [tangcj@nju.edu.cn](mailto:tangcj@nju.edu.cn) (C. Tang)

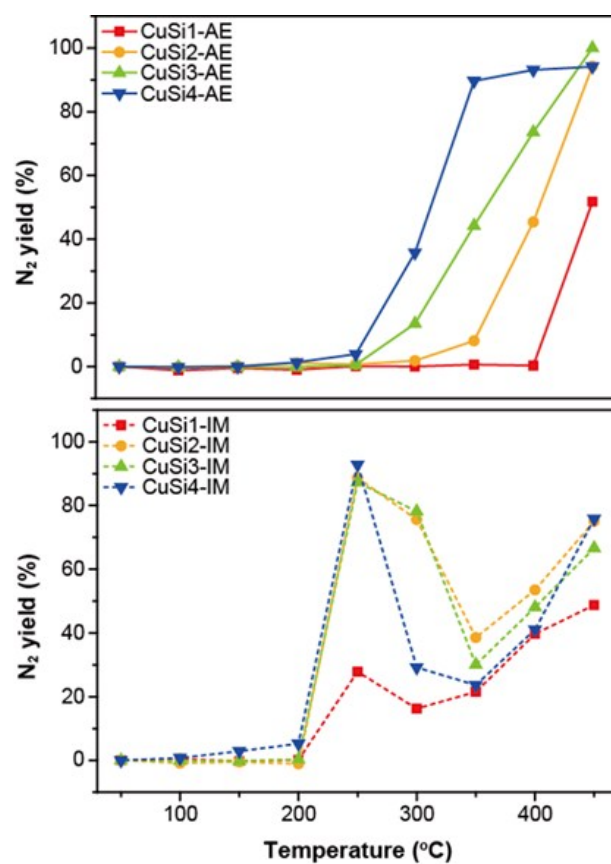

**Fig. S1** N<sub>2</sub> yield of CuSi-AE and CuSi-IM samples as a function of the reaction temperature.
